# Supplementary material
Source: MDPI journal article supplement (https://www.mdpi.com/1424-2818/14/5/312)
Supplement: s1 [file s1]

Supplementary Materials

**Table S1.** Details of crossing structures on National Highway 44 passing through Pench tiger reserve, Maharashtra.

| <i>S.no.</i> | <i>Structure ID</i> | <i>Structure type</i> | <i>Width<br/>(m)</i> | <i>Distance to<br/>tiger re-<br/>serve (m)</i> | <i>Distance to next<br/>crossing struc-<br/>ture (m)</i> | <i>Number of cam-<br/>era traps de-<br/>ployed</i> |
|--------------|---------------------|-----------------------|----------------------|------------------------------------------------|----------------------------------------------------------|----------------------------------------------------|
| 1.           | MNB1                | Minor bridge          | 60                   | 3202                                           | 600                                                      | 3                                                  |
| 2.           | AUP2                | Animal underpass      | 50                   | 2832                                           | 600                                                      | 2                                                  |
| 3.           | AUP3                | Animal underpass      | 750                  | 2267                                           | 1740                                                     | 24                                                 |
| 4.           | MNB4                | Minor bridge          | 80                   | 1263                                           | 1578                                                     | 4                                                  |
| 5.           | AUP5                | Animal underpass      | 300                  | 0                                              | 1578                                                     | 10                                                 |
| 6.           | MNB6                | Minor bridge          | 65                   | 0                                              | 5800                                                     | 3                                                  |
| 7.           | AUP7                | Animal underpass      | 100                  | 0                                              | 1800                                                     | 5                                                  |
| 8.           | AUP8                | Animal underpass      | 750                  | 0                                              | 1800                                                     | 25                                                 |
| 9.           | MNB9                | Minor bridge          | 50                   | 0                                              | 1800                                                     | 2                                                  |

**Table S2.** Model selection table showing best models with factors explaining prey–predator, predator–prey and prey–dog latencies, with Akaike’s Information Criterion values, difference in AIC ( $\Delta$ AIC) from the best model, and degrees of freedom (df). Models with AIC < 2 were averaged.

| <b>Variables</b>                                   | <b>Prey–predator</b> |                               |           | <b>logLik</b> |
|----------------------------------------------------|----------------------|-------------------------------|-----------|---------------|
|                                                    | <b>AIC</b>           | <b><math>\Delta</math>AIC</b> | <b>df</b> |               |
| month+ width+ (1 station)                          | 5091.8               | 0                             | 15        | −2530.9       |
| month+ dist_next +width + (1   station)            | 5092.37              | 0.57                          | 16        | −2530.18      |
| month + str_type + width + (1   station)           | 5093.23              | 1.43                          | 16        | −2530.62      |
| month + dist_pa + width +(1   station)             | 5093.55              | 1.75                          | 16        | −2530.78      |
| month+ dist_next + dist_pa + width + (1   station) | 5093.77              | 1.97                          | 17        | −2529.88      |
| <b>variables</b>                                   | <b>Predator–prey</b> |                               |           | <b>logLik</b> |
|                                                    | <b>AIC</b>           | <b><math>\Delta</math>AIC</b> | <b>df</b> |               |
| month+ width + (1   station)                       | 5098.1               | 0                             | 15        | −2534.05      |
| month + (1   station)                              | 5098.38              | 0.28                          | 14        | −2535.19      |
| month+ dist_pa + width + (1   station)             | 5099.87              | 1.77                          | 16        | −2533.94      |
| month+ dist_next + width + (1   station)           | 5100.01              | 1.91                          | 15        | −2535.05      |

|                                                                                                                                 |          |      |    |          |
|---------------------------------------------------------------------------------------------------------------------------------|----------|------|----|----------|
| month + str_type + width+ (1   station)                                                                                         | 5100.07  | 1.97 | 16 | −2534.01 |
| month + dist_next + (1   station)                                                                                               | 5100.09  | 1.99 | 16 | −2534.04 |
| <b>Prey-dog</b>                                                                                                                 |          |      |    |          |
| variables                                                                                                                       | AIC      | ΔAIC | df | logLik   |
| month+ str_type+ dist_next + width+str_type x<br>dist_next + str_type x width+ (1   station)                                    | 22093.13 | 0    | 19 | −11027.6 |
| month+ str_type +dist_next + dist_pa + width +<br>str_type x dist_next + str_type x width+ (1   station)                        | 22093.81 | 0.68 | 20 | −11026.9 |
| month + str_type + width + str_type x width+ (1  <br>station)                                                                   | 22094.62 | 1.49 | 17 | −11030.3 |
| month + str_type +dist_next + dist_pa + width+<br>str_type x dist_next+ str_type x dist_pa + str_type x<br>width+ (1   station) | 22094.76 | 1.63 | 21 | −11026.4 |

**Table S3.** Model-averaged coefficients ( $\beta$ ) for models explaining factors affecting prey–predator, predator–prey and prey–dog latencies at crossing structures on NH 44 passing through Pench Tiger Reserve, Maharashtra, India.

| <b>Prey–predator</b>                           |         |      |
|------------------------------------------------|---------|------|
|                                                | $\beta$ | CI   |
| Intercept                                      | 5.78*** | 0.28 |
| (month)August                                  | −0.27   | 0.36 |
| (month)December                                | 0.13    | 0.32 |
| (month)February                                | −0.62   | 0.33 |
| (month)January                                 | −0.5    | 0.35 |
| (month)July                                    | −0.28   | 0.38 |
| (month)June                                    | −0.11   | 0.36 |
| (month)March                                   | −0.82*  | 0.4  |
| (month)May                                     | −0.67   | 0.41 |
| (month)November                                | 0.23    | 0.36 |
| (month)October                                 | 0.02    | 0.37 |
| (month)September                               | 0.25    | 0.37 |
| width                                          | −0.2**  | 0.07 |
| dist_next                                      | 0.03    | 0.05 |
| (str_type)MNB                                  | 0.04    | 0.17 |
| dist_pa                                        | 0.01    | 0.04 |
| Num. obs.                                      | 387     |      |
| *** $p < 0.001$ ; ** $p < 0.01$ ; * $p < 0.05$ |         |      |
| <b>Predator–prey</b>                           |         |      |
|                                                | $\beta$ | CI   |
| Intercept                                      | 6***    | 0.27 |
| (month)August                                  | −0.52   | 0.34 |
| (month)December                                | −0.01   | 0.31 |
| (month)February                                | −0.85** | 0.32 |
| (month)January                                 | −0.47   | 0.35 |
| (month)July                                    | −0.14   | 0.36 |
| (month)June                                    | −0.32   | 0.36 |
| (month)March                                   | −0.04   | 0.38 |
| (month)May                                     | 0.22    | 0.4  |
| (month)November                                | 0.15    | 0.35 |
| (month)October                                 | 0.33    | 0.35 |
| (month)September                               | −0.05   | 0.35 |
| width                                          | −0.06   | 0.07 |
| dist_pa                                        | 0       | 0.02 |
| dist_next                                      | 0.01    | 0.03 |
| (str_type)MNB                                  | 0       | 0.1  |

| Num. obs. 374                                  |         |      |
|------------------------------------------------|---------|------|
| *** $p < 0.001$ ; ** $p < 0.01$ ; * $p < 0.05$ |         |      |
| Prey-dog                                       |         |      |
|                                                | $\beta$ | CI   |
| Intercept                                      | 5.43*** | 0.1  |
| (month)August                                  | 0.81*** | 0.15 |
| (month)December                                | 0.56*** | 0.13 |
| (month)February                                | 0.46*** | 0.14 |
| (month)January                                 | 0.27*   | 0.13 |
| (month)July                                    | 0.67*** | 0.13 |
| (month)June                                    | 0.58*** | 0.13 |
| (month)March                                   | 0.37**  | 0.13 |
| (month)May                                     | 0.48*** | 0.14 |
| (month)November                                | 0.77*** | 0.15 |
| (month)October                                 | 0.61*** | 0.14 |
| (month)September                               | 0.67*** | 0.14 |
| (str_type)MNB                                  | -5.69*  | 2.46 |
| dist_next                                      | 0.23    | 0.15 |
| Width                                          | -0.12   | 0.06 |
| (str_type)MNB x dist_next                      | -0.23   | 0.16 |
| (str_type)MNB x width                          | -5.78*  | 2.41 |
| dist_pa                                        | 0.03    | 0.05 |
| (str_type)MNB x dist_pa                        | -0.03   | 0.09 |
| Num. obs.                                      | 1602    |      |
| *** $p < 0.001$ ; ** $p < 0.01$ ; * $p < 0.05$ |         |      |

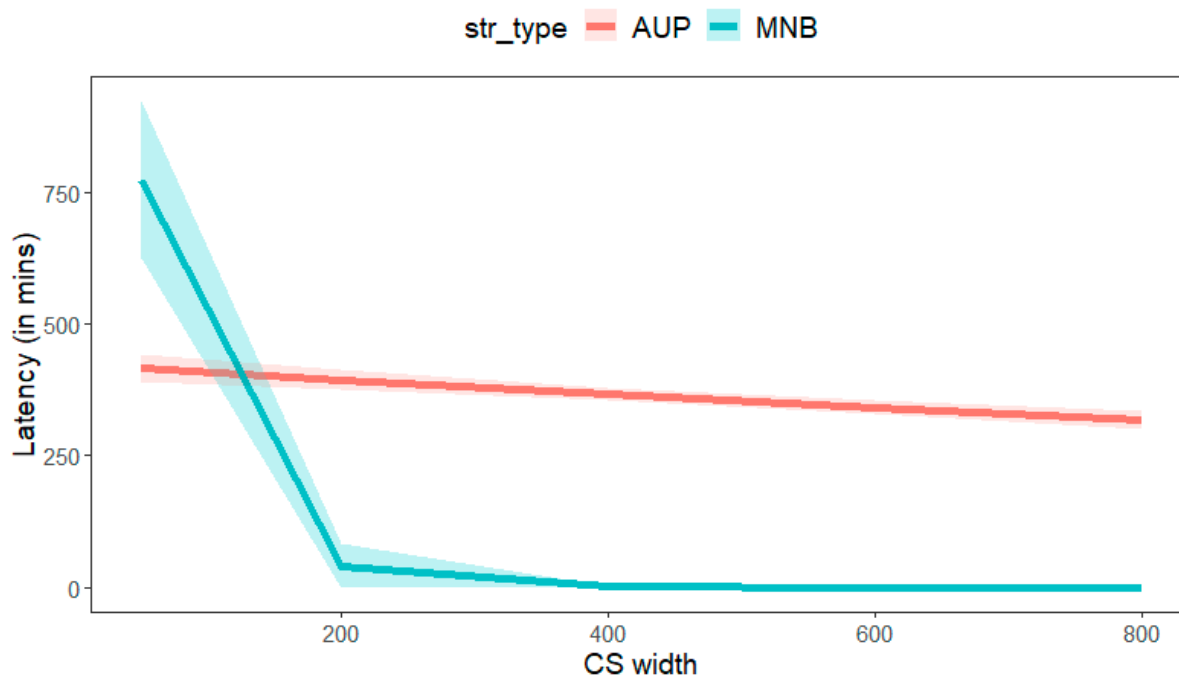

**Figure S1.** Plot showing the interactive influence of crossing structure type and crossing structure width on geometric mean latencies (in minutes).

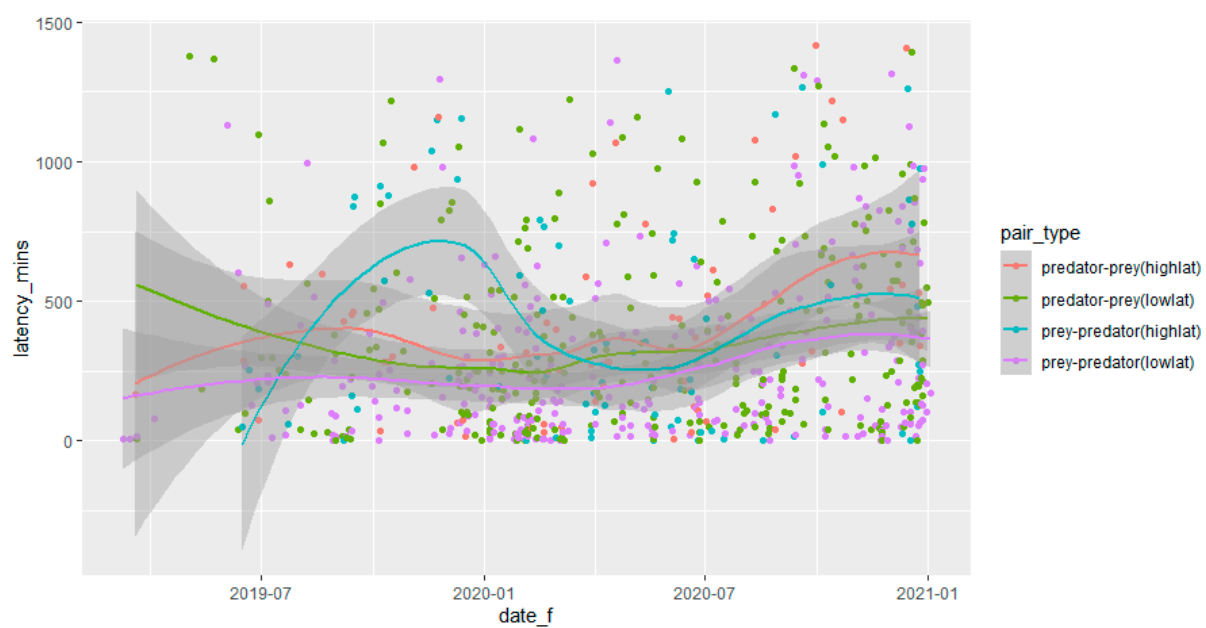

**Figure S2.** Variation in predator–prey and prey–predator latencies among crossing structures with high (highlat) and low (lowlat) overall prey–predator latencies throughout the monitoring period.
